# Supplementary material for: Genome-wide analysis of DNA methylation in buccal cells: a study of monozygotic twins and mQTLs
Source: PubMed Central journal article supplement (PMC6156977; doi:10.1186/s13072-018-0225-x), 2018-09-25

# DMPs in DNase I sites (probably TF sites) in cell lines for erc2-H3-all Unnamed

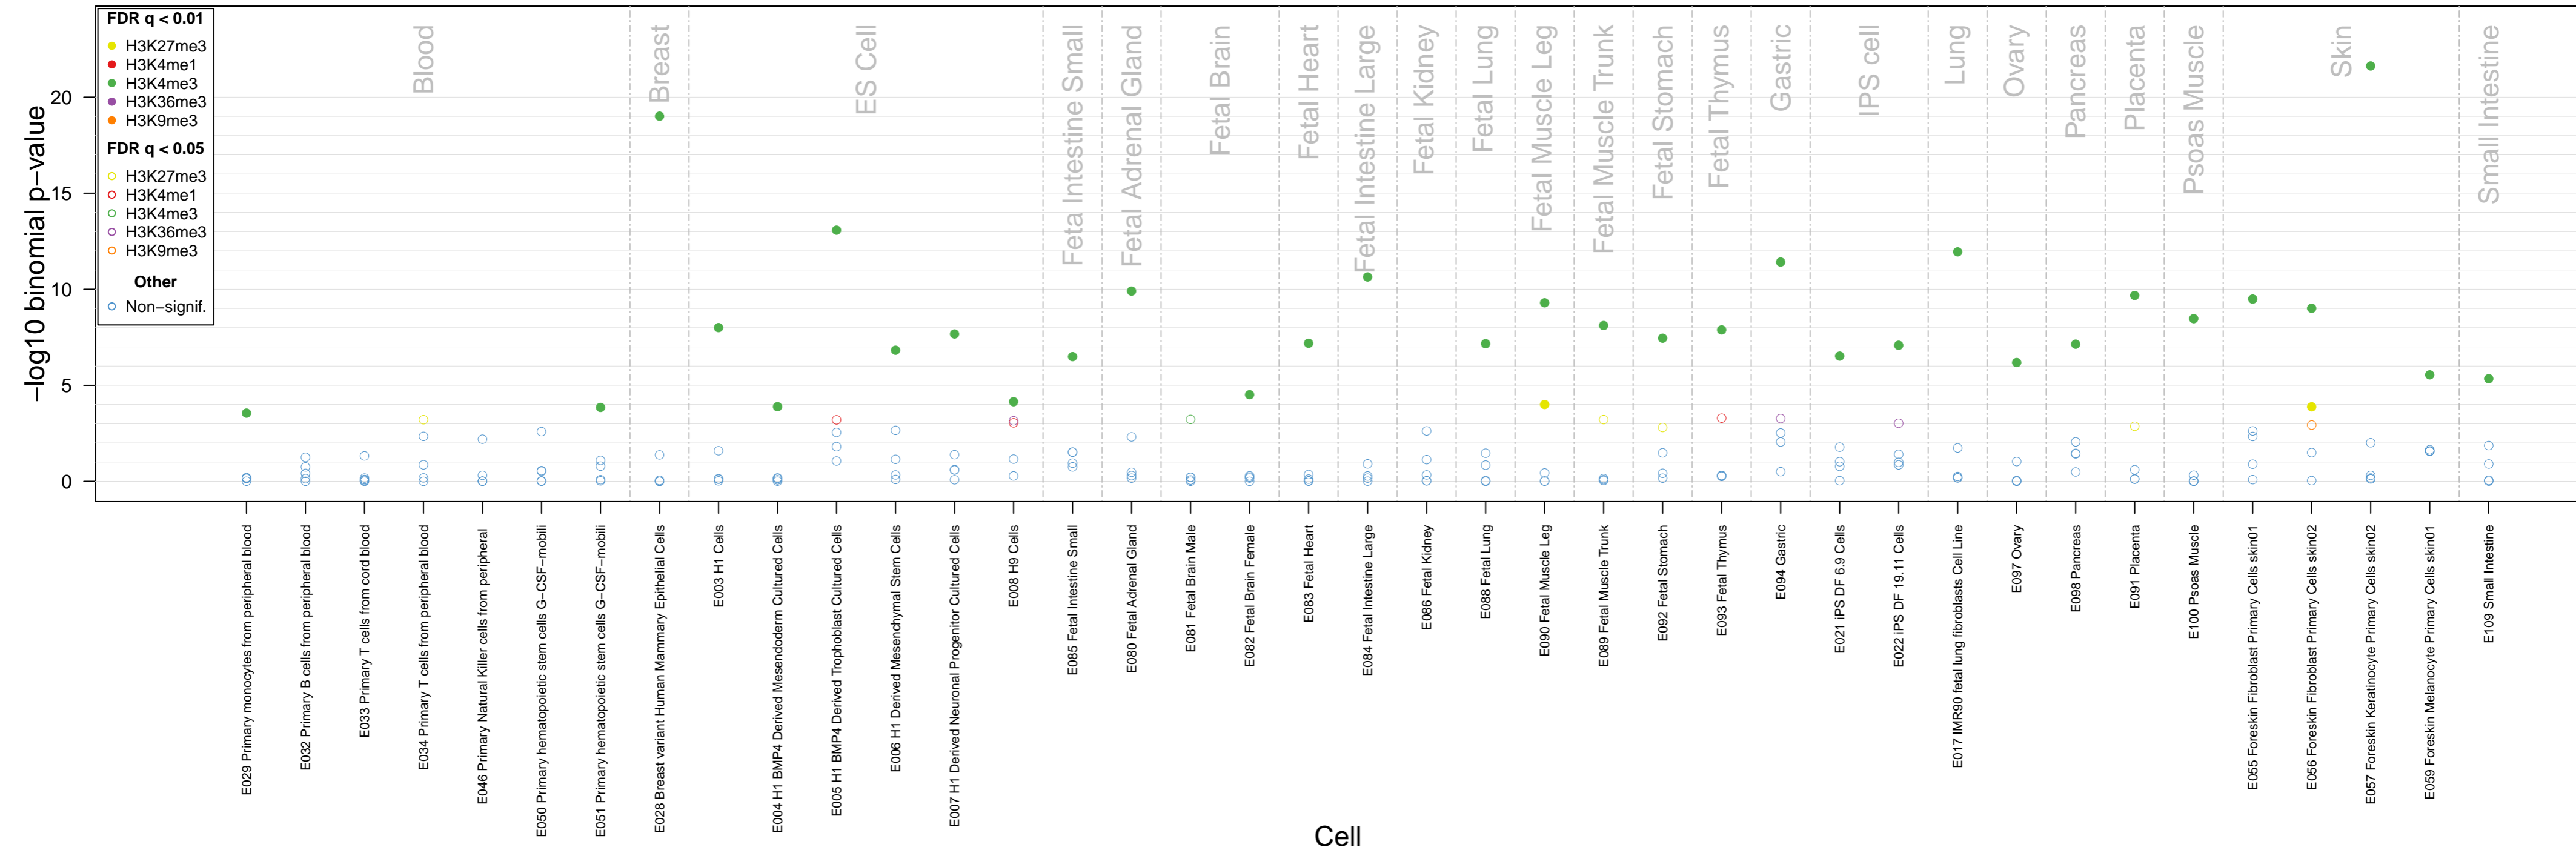

Supplement: 13072_2018_225_MOESM10_ESM.pdf [file 13072_2018_225_MOESM10_ESM.pdf]
